# Supplementary material for: CsMYB Transcription Factors Participate in Jasmonic Acid Signal Transduction in Response to Cold Stress in Tea Plant (Camellia sinensis)
Source: MDPI journal article supplement (doi:10.3390/plants11212869), 2022-10-27
Supplement: s1 [file s1]

**Table S1. Primer information.**

| Primer Name                                       | Primer Sequence                                            |
|---------------------------------------------------|------------------------------------------------------------|
| <b>Primer for qRT-PCR</b>                         |                                                            |
| <i>Csβ-actin-q-F</i>                              | GCCATCTTTGATTGGAATGG                                       |
| <i>Csβ-actin-q-R</i>                              | GGTGCCACAACCTTGATCTT                                       |
| <i>CsMYB13-q-F</i>                                | AGGCTACCAGGGCGAACAG                                        |
| <i>CsMYB13-q-R</i>                                | TTTGGCTCGGACCACATCA                                        |
| <i>CsMYB19-q-F</i>                                | AACCTCAGCCAGAAATGC                                         |
| <i>CsMYB19-q-R</i>                                | AACTCACAAGGCGTCCAG                                         |
| <i>CsMYB29-q-F</i>                                | CCTTGAGTGAGTTGGTGAT                                        |
| <i>CsMYB29-q-R</i>                                | CCAGCATTCTTCGGCATA                                         |
| <i>CsMYB31-q-F</i>                                | ACAGACAAACCCGGCAAAC                                        |
| <i>CsMYB31-q-R</i>                                | TGGTGACCTGGAGGAAGC                                         |
| <i>CsMYB33-q-F</i>                                | ACAAGGAAGGTGAGGGACG                                        |
| <i>CsMYB33-q-R</i>                                | GTTGCCGAGAAGGCGATG                                         |
| <i>CsMYB34-q-F</i>                                | CGCTGCGGAAAGAGTTGC                                         |
| <i>CsMYB34-q-R</i>                                | TGGAGGCGGAGAATGAGG                                         |
| <i>CsMYB45-q-F</i>                                | CTCCCTCACCTATCCTTACCC                                      |
| <i>CsMYB45-q-R</i>                                | CACCACTGCGTTCCTAATCG                                       |
| <i>CsMYB46-q-F</i>                                | GGAACCGACCCGAATACC                                         |
| <i>CsMYB46-q-R</i>                                | TTGAGGAAGAACCGCCAC                                         |
| <i>CsMYB47-q-F</i>                                | GTCAGGGTTGCGTAGATG                                         |
| <i>CsMYB47-q-R</i>                                | GGAGATTCGAGGACAGAAG                                        |
| <i>CsMYB62-q-F</i>                                | GGACGAACCGACAACGAAA                                        |
| <i>CsMYB62-q-R</i>                                | TGCTGGTGGTGGTGATGGA                                        |
| <i>CsMYB79-q-F</i>                                | ATTATCCAGTCACGGCCCATCC                                     |
| <i>CsMYB79-q-R</i>                                | CCGCCATTCCAAGCATTTAGT                                      |
| <i>CsMYB81-q-F</i>                                | GGGAGATTGCCAGGACGAA                                        |
| <i>CsMYB81-q-R</i>                                | CACGGTCTTTAGAAGCAGATGAG                                    |
| <i>CsMYB82-q-F</i>                                | ATCTCCGTCCAGGTATCAA                                        |
| <i>CsMYB82-q-R</i>                                | AACCCAAATCAGGAAATCG                                        |
| <i>CsMYB97-q-F</i>                                | ATGATTGGTGGGATGAGC                                         |
| <i>CsMYB97-q-R</i>                                | TAGGATGGACCAGCAAAG                                         |
| <i>CsMYB105-q-F</i>                               | GGTGCTCCTTGATTGCTG                                         |
| <i>CsMYB105-q-R</i>                               | GGCGTGCTTTCTTGTTCC                                         |
| <i>CsMYB116-q-F</i>                               | CCCAAGTCCCTTCTTTATCTC                                      |
| <i>CsMYB116-q-R</i>                               | TATTTCCATCCTAAGCCAACG                                      |
| <b>Primer for gene cloning</b>                    |                                                            |
| <i>CsMYB45-F</i>                                  | ATGGCTTCTTTGTCTAGGAAGGA                                    |
| <i>CsMYB45-R</i>                                  | CTCGATCTTGCTAATCCCAATC                                     |
| <i>CsMYB46-F</i>                                  | ATGGGAAGGGCTCCATGTT                                        |
| <i>CsMYB46-R</i>                                  | TATCAGCAAAGATTCAGCAAAG                                     |
| <i>CsMYB105-F</i>                                 | ATGGCTCCGAAGAGCAGT                                         |
| <i>CsMYB105-R</i>                                 | CCATTTATCGGTAAGTGCC                                        |
| <b>Primer for subcellular localization assays</b> |                                                            |
| <i>CsMYB45-attb-F</i>                             | GGGGACAAGTTTGTACAAAAAAGCAGGCTTCATGGCTTCTTTGTCTAGGA<br>AGGA |
| <i>CsMYB45-attb--R</i>                            | GGGGACCACTTTGTACAAGAAAGCTGGGTCTCGATCTTGCTAATCCCAA<br>TTC   |
| <i>CsMYB46-attb--F</i>                            | GGGGACAAGTTTGTACAAAAAAGCAGGCTTCATGGGAAGGGCTCCATGTT         |
| <i>CsMYB46-attb--R</i>                            | GGGGACCACTTTGTACAAGAAAGCTGGGTCTATCAGCAAAGATTCAGCAA<br>AG   |
| <i>CsMYB105-attb--F</i>                           | GGGGACAAGTTTGTACAAAAAAGCAGGCTTCATGGCTCCGAAGAGCAGT<br>GA    |
| <i>CsMYB105-attb--R</i>                           | GGGGACCACTTTGTACAAGAAAGCTGGGTCCCATTATCGGTAAGTGCCT<br>GAT   |
| <b>Primer for prokaryotic expression assay</b>    |                                                            |

pGEX-4T-1-*CsMYB45*-F  
pGEX-4T-1-*CsMYB45*-R  
pGEX-4T-1-*CsMYB46*-F  
pGEX-4T-1-*CsMYB46*-R  
pGEX-4T-1-*CsMYB105*-F  
pGEX-4T-1-*CsMYB105*-R

**Primer for yeast two-hybrid and BiFC  
assay**

*CsMYB45*-BD-F  
*CsMYB45*-BD-R  
*CsMYB46*-BD-F  
*CsMYB46*-BD-R  
*CsMYB105*-BD-F  
*CsMYB105*-BD-R  
*CsJAZ3*-AD-F  
*CsJAZ3*-AD-R  
*CsJAZ10*-AD-F  
*CsJAZ10*-AD-R  
*CsJAZ11*-AD-F  
*CsJAZ11*-AD-R

pCAMBIA 1300-35S-C-YFPC-*CsMYB46*-F  
pCAMBIA 1300-35S-C-YFPC-*CsMYB46*-  
R  
pCAMBIA 1300-35S-C-YFPC-*CsMYB105*-  
F  
pCAMBIA 1300-35S-C-YFPC-*CsMYB105*-  
R  
pCAMBIA 1300-35S-C-YFPN-*CsJAZ3*-F  
pCAMBIA 1300-35S-C-YFPN-*CsJAZ3*-R  
pCAMBIA 1300-35S-C-YFPN-*CsJAZ10*-F  
pCAMBIA 1300-35S-C-YFPN-*CsJAZ10*-R  
pCAMBIA 1300-35S-C-YFPN-*CsJAZ11*-F  
pCAMBIA 1300-35S-C-YFPN-*CsJAZ11*-R

CGCGTGGATCCCCGGAATTCATGGCTTCTTTGTCTAGGAAGGA  
GCTCGAGTCGACCCGGGAATTCCTCGATCTTGCTAATCCCAATTC  
CGCGTGGATCCCCGGAATTCATGGGAAGGGCTCCATGTT  
GCTCGAGTCGACCCGGGAATTCATCAGCAAAGATTCAGCAAAG  
CGCGTGGATCCCCGGAATTCATGGCTCCGAAGAGCAGTGA  
GCTCGAGTCGACCCGGGAATTCCTATTCGGTAAGTGCCTGAT

AGGCCGAATTCCTCGGGGATCCATGGCTTCTTTGTCTAGGAAGGA  
CCGCTGCAGGTCGACGGATCCCTCGATCTTGCTAATCCCAATTC  
AGGCCGAATTCCTCGGGGATCCATGGGAAGGGCTCCATGTT  
CCGCTGCAGGTCGACGGATCCCCATTTATCGGTAAGTGCCTGAT  
AGGCCGAATTCCTCGGGGATCCATGGCTCCGAAGAGCAGTGA  
CCGCTGCAGGTCGACGGATCCCCATTTATCGGTAAGTGCCTGAT  
GTGGGCATCGATACGGGATCCATGTCGAGTTCGTCTGGT  
CAGCTCGAGCTCGATGGATCCCAAATGGTGCTCAAAGTGC  
GTGGGCATCGATACGGGATCCATGTCGAGTTCGTCTGGTTC  
CAGCTCGAGCTCGATGGATCCCCATCTTTTCTCTTCTCCA  
GTGGGCATCGATACGGGATCCATGGCAAGTTCTCAAGTGTT  
CAGCTCGAGCTCGATGGATCCCAAATTTGAGATCAAGCTGTT  
GAGCTCGGTACCCGGGGATCCATGGGAAGGGCTCCATGTT

CATGTCGACTCTAGAGGATCCTATCAGCAAAGATTCAGCAAAG

GAGCTCGGTACCCGGGGATCCATGGCTCCGAAGAGCAGTGA

CATGTCGACTCTAGAGGATCCCCATTTATCGGTAAGTGCCTGAT

GAGCTCGGTACCCGGGGATCCATGTCGAGTTCGTCTGGT  
CATGTCGACTCTAGAGGATCCCAAATGGTGCTCAAAGTGC  
GAGCTCGGTACCCGGGGATCCATGTCGAGTTCGTCTGGTTC  
CATGTCGACTCTAGAGGATCCCCATCTTTTCTCTTCTCCA  
GAGCTCGGTACCCGGGGATCCATGGCAAGTTCTCAAGTGTT  
CATGTCGACTCTAGAGGATCCCAAATTTGAGATCAAGCTGTT

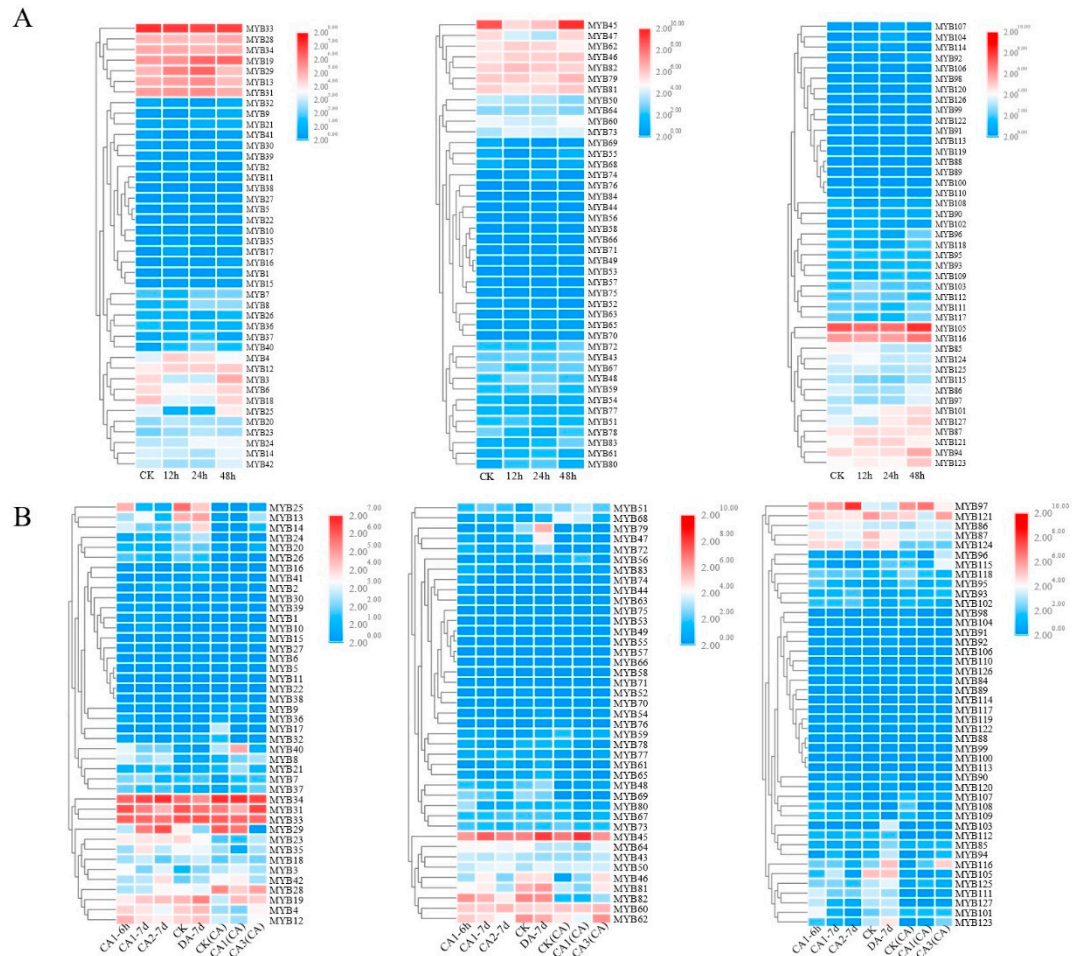

**Figure S1.** Expression patterns of MYB genes in response to MeJA and cold treatments. A. Gene expression at different time points after MeJA treatment. B. Gene expression at three time periods during the cold acclimation (CA) process, including different periods of CA: non-acclimated (25–20 °C, CK), fully acclimated at 10 °C for 6 h (CA1-6h) and at 10–4 °C for 7 days (CA1-7d), cold response at 4–0 °C for 7 days (CA2-7d), recovery at 25–20 °C for 7 days (DA-7d), and non-acclimated (CK), fully acclimated (CA1), and de-acclimated (CA3)[1].

## Reference

1. Wang, X. C., Zhao, Q. Y., Ma, C. L., Zhang, Z. H., Cao, H. L., Kong, Y. M., Yue, C., Hao, X. Y., Chen, L., Ma, J. Q., Jin, J. Q., Li, X. & Yang, Y. J. Global transcriptome profiles of *Camellia sinensis* during cold acclimation. *Bmc Genomics* 14, doi:10.1186/1471-2164-14-415 (2013).
